# Supplementary material for: OPRM1 c.118A>G Polymorphism and Duration of Morphine Treatment Associated with Morphine Doses and Quality-of-Life in Palliative Cancer Pain Settings
Source: MDPI journal article supplement (doi:10.3390/ijms18040669), 2017-03-27
Supplement: s1 [file s1]

**Table S1.** Association between VAS scores and various types of cancer groups.

|            |                        | N  | Mean | Std. Deviation | <i>p</i> |
|------------|------------------------|----|------|----------------|----------|
| VAS scores | Urogenital             | 6  | 3.33 | 3.011          | 0.874    |
|            | Lung                   | 15 | 2.73 | 2.520          |          |
|            | Breast                 | 16 | 3.31 | 3.219          |          |
|            | Prostate               | 4  | 3.38 | 3.902          |          |
|            | Gastrointestinal tract | 20 | 4.58 | 3.006          |          |
|            | Gynecologic            | 6  | 2.67 | 3.204          |          |
|            | Hematologic            | 9  | 3.67 | 3.240          |          |
|            | Sarcoma                | 2  | 3.50 | 4.950          |          |
|            | Head and neck          | 2  | 2.50 | 3.536          |          |
|            | Pancreas               | 4  | 2.25 | 2.062          |          |
|            | Others                 | 5  | 2.80 | 1.924          |          |

**Table S2.** Association between morphine doses and various types of cancer groups.

|                |                        | N  | Mean    | Std. Deviation | <i>p</i> |
|----------------|------------------------|----|---------|----------------|----------|
| Morphine Doses | Urogenital             | 6  | 26.6667 | 14.11264       | 0.129    |
|                | Lung                   | 15 | 33.1667 | 28.16512       |          |
|                | Breast                 | 16 | 44.6875 | 41.56195       |          |
|                | Prostate               | 4  | 20.4000 | 6.73102        |          |
|                | Gastrointestinal tract | 20 | 30.4980 | 17.35949       |          |
|                | Gynecologic            | 6  | 22.3600 | 26.07983       |          |
|                | Hematologic            | 9  | 36.2000 | 27.94231       |          |
|                | Sarcoma                | 2  | 83.3000 | 23.61737       |          |
|                | Head and neck          | 2  | 18.7500 | 15.90990       |          |
|                | Pancreas               | 4  | 73.1250 | 92.54222       |          |
|                | Others                 | 5  | 15.0000 | 5.30330        |          |

**Table S3.** Association between treatment duration and various types of cancer groups.

|                    |                        | N  | Mean   | Std. Deviation | <i>p</i> |
|--------------------|------------------------|----|--------|----------------|----------|
| Treatment duration | Urogenital             | 6  | 75.33  | 122.469        | 0.111    |
|                    | Lung                   | 13 | 16.23  | 14.805         |          |
|                    | Breast                 | 16 | 240.12 | 571.990        |          |
|                    | Prostate               | 4  | 32.50  | 27.923         |          |
|                    | Gastrointestinal tract | 20 | 77.90  | 171.702        |          |
|                    | Gynecologic            | 5  | 30.80  | 34.215         |          |
|                    | Hematologic            | 9  | 100.33 | 169.801        |          |
|                    | Sarcoma                | 2  | 196.00 | 219.203        |          |
|                    | Head and neck          | 2  | 7.00   | 2.828          |          |
|                    | Pancreas               | 3  | 866.33 | 1465.108       |          |
|                    | Others                 | 5  | 22.40  | 39.532         |          |

**Table S4.** Association between VAS scores and different demographic and genetic factors.

|                                       | N  | Mean VAS Scores | Std. Deviation | <i>p</i> |
|---------------------------------------|----|-----------------|----------------|----------|
| <b>Sexe</b>                           |    |                 |                | 0.960    |
| Men                                   | 46 | 3.34            | 2.864          |          |
| Women                                 | 43 | 3.48            | 3.026          |          |
| <b>COMT SNP</b>                       |    |                 |                | 0.541    |
| ValMet/MetMet                         | 66 | 3.27            | 2.924          |          |
| ValVal                                | 23 | 3.78            | 2.969          |          |
| <b>ABCB1 SNP</b>                      |    |                 |                | 0.664    |
| CT/TT                                 | 60 | 3.30            | 2.860          |          |
| CC                                    | 29 | 3.62            | 3.101          |          |
| <b>OPRM1 SNP</b>                      |    |                 |                | 0.224    |
| AA                                    | 69 | 3.61            | 2.948          |          |
| AG                                    | 20 | 2.70            | 2.812          |          |
| <b>Metastasis</b>                     |    |                 |                | 0.476    |
| Oui                                   | 62 | 3.37            | 3.049          |          |
| Non                                   | 27 | 3.48            | 2.680          |          |
| <b>Concomitant opioids use</b>        |    |                 |                | 0.218    |
| Oui                                   | 6  | 4.83            | 2.229          |          |
| Non                                   | 83 | 3.30            | 2.955          |          |
| <b>Concomitant use of other drugs</b> |    |                 |                | 0.388    |
| Oui                                   | 64 | 3.59            | 3.070          |          |
| Non                                   | 25 | 2.92            | 2.515          |          |

**Table S5.** Association between VAS scores and age, weight, creatinine clearance, treatment duration, morphine dose and duration since the beginning of treatment.

|                          |                         | VAS scores |
|--------------------------|-------------------------|------------|
| Age                      | Correlation Coefficient | -.125      |
|                          | -p-value                | .242       |
|                          | N                       | 89         |
| Weight                   | Correlation Coefficient | .058       |
|                          | Sig. (2-tailed)         | .590       |
|                          | N                       | 89         |
| Creatinine clearance     | Correlation Coefficient | -.100      |
|                          | Sig. (2-tailed)         | .352       |
|                          | N                       | 88         |
| Treatment duration       | Correlation Coefficient | -.052      |
|                          | Sig. (2-tailed)         | .635       |
|                          | N                       | 85         |
| Morphine dose            | Correlation Coefficient | .092       |
|                          | Sig. (2-tailed)         | .390       |
|                          | N                       | 89         |
| Duration since diagnosis | Correlation Coefficient | -.047      |
|                          | Sig. (2-tailed)         | .669       |
|                          | N                       | 85         |

**Table S6.** The PCR protocol and conditions for *OPRM1*, *COMT* and *ABCB1* genotyping.

|                     | PCR   |        |        |           | FUSION CURVES |                  |
|---------------------|-------|--------|--------|-----------|---------------|------------------|
| OPRM1 C.118A>G      | 5 s à | 10 s à | 15 s à | 45 cycles | 95 s à        | De 40°C à 85°C à |
|                     | 95°C  | 55°C   | 72°C   |           | 40°C          | 0,2°C/s          |
| COMT<br>P.VAL158MET | 5 s à | 10 s à | 15 s à | 45 cycles | 95 s à        | De 40°C à 85°C à |
|                     | 95°C  | 60°C   | 72°C   |           | 40°C          | 0,2°C/s          |
| ABCB1 C.3435C>T     | 5 s à | 10 s à | 15 s à | 45 cycles | 95 s à        | De 40°C à 85°C à |
|                     | 95°C  | 54°C   | 72°C   |           | 40°C          | 0,2°C/s          |

**Table S7.** The EORTC-QLQ-C30 version 1.0 with functional / symptom scales indicated.

|                                                                                                          | SCALE    | NO | YES |
|----------------------------------------------------------------------------------------------------------|----------|----|-----|
| 1. Do you have any trouble doing strenuous activities, like carrying a heavy shopping bag or a suitcase? | Physical | 1  | 2   |
| 2. Do you have any trouble taking a <b>long</b> walk?                                                    | Physical | 1  | 2   |
| 3. Do you have any trouble take a <b>short</b> walk outside of the house?                                | Physical | 1  | 2   |
| 4. Do have to stay in bed or a chair for most of the day?                                                | Physical | 1  | 2   |
| 5. Do you need help with eating, dressing, washing yourself or using the toilet?                         | Physical | 1  | 2   |
| 6. Are you limited in any way in doing either your work or doing household jobs?                         | Role     | 1  | 2   |
| 7. Are you completely unable to work at a job or to do household jobs?                                   | Role     | 1  | 2   |

  

| During the past week:              | SCALE               | Not at all | A little | Quite a bit | Very much |
|------------------------------------|---------------------|------------|----------|-------------|-----------|
| 8. Were you short of breath?       | Dyspnoea            | 1          | 2        | 3           | 4         |
| 9. Have you had pain?              | Pain                | 1          | 2        | 3           | 4         |
| 10. Did you need rest?             | Fatigue             | 1          | 2        | 3           | 4         |
| 11. Have you had trouble sleeping? | Insomnia            | 1          | 2        | 3           | 4         |
| 12. Have you felt weak?            | Fatigue             | 1          | 2        | 3           | 4         |
| 13. Have you lacked appetite?      | Appetite Loss       | 1          | 2        | 3           | 4         |
| 14. Have you felt nauseated?       | Nausea and Vomiting | 1          | 2        | 3           | 4         |
| 15. Have you vomited?              | Nausea and Vomiting | 1          | 2        | 3           | 4         |

  

| During the past week:                                                                                    | SCALE                  | Not at all | A little | Quite a bit | Very much |
|----------------------------------------------------------------------------------------------------------|------------------------|------------|----------|-------------|-----------|
| 16. Have you been constipated?                                                                           | Constipation           | 1          | 2        | 3           | 4         |
| 17. Have you had diarrhoea?                                                                              | Diarrhoea              | 1          | 2        | 3           | 4         |
| 18. Were you tired?                                                                                      | Fatigue                | 1          | 2        | 3           | 4         |
| 19. Did pain interfere with you daily activities?                                                        | Pain                   | 1          | 2        | 3           | 4         |
| 20. Have you had difficulty in concentrating on things, like reading a newspaper or watching television? | Cognitive              | 1          | 2        | 3           | 4         |
| 21. Did you feel tense?                                                                                  | Emotional              | 1          | 2        | 3           | 4         |
| 22. Did you worry?                                                                                       | Emotional              | 1          | 2        | 3           | 4         |
| 23. Did you feel irritable?                                                                              | Emotional              | 1          | 2        | 3           | 4         |
| 24. Did you feel depressed?                                                                              | Emotional              | 1          | 2        | 3           | 4         |
| 25. Have you had difficulty remembering things?                                                          | Cognitive              | 1          | 2        | 3           | 4         |
| 26. Has your physical condition or medical treatment interfered with your <b>family</b> life?            | Social                 | 1          | 2        | 3           | 4         |
| 27. Has your physical condition or medical treatment interfered with your <b>social</b> activities?      | Social                 | 1          | 2        | 3           | 4         |
| 28. Has your physical condition or medical treatment caused you financial difficulties?                  | Financial Difficulties | 1          | 2        | 3           | 4         |

  

| GLOBAL HEALTH STATUS                                                                |   |   |   |   |   |             |
|-------------------------------------------------------------------------------------|---|---|---|---|---|-------------|
| 29. How would you rate your overall <b>physical condition</b> during the past week? |   |   |   |   |   |             |
| 1 Very poor                                                                         | 2 | 3 | 4 | 5 | 6 | 7 Excellent |
| 30. How would you rate your overall <b>quality of life</b> during the past week?    |   |   |   |   |   |             |
| 1 Very poor                                                                         | 2 | 3 | 4 | 5 | 6 | 7 Excellent |
